# Supplementary material for: Occult periprosthetic femoral fractures occur frequently during a long, trapezoidal, double-tapered cementless femoral stem fixation in primary THA
Source: PLoS One. 2019 Sep 19;14(9):e0221731. doi: 10.1371/journal.pone.0221731 (PMC6752856; doi:10.1371/journal.pone.0221731)
Supplement: S1 Dataset — (XLSX) [file pone.0221731.s001.xlsx]

## Sheet: minimal data set
Sex	Age	Diagnosis	Height	Weight	BMI	Stem size	Canal (↑2cm)	Canal (↓3cm)	canal (↓10cm)	cortex (↓10cm)	canal(↓7cm)	Stem(↑2cm)	stem(↓7cm)	CFI	CCR	CBR	CFR(↑2cm)	CFR(↓7cm)	Fx (femur)	Classification
F	70	Neck fracture	1.506	56.75	25.0216	10	42.22	13.33	9.1	29.71	12.47	26.56	10.2	4.63956	0.682671	0.306294	0.629086	0.817963	X
M	61	LCP sequale	1.64	82.1	30.634	12	48.36	18.44	13.23	28.73	14.91	26.95	11.49	3.65533	0.717462	0.460494	0.557279	0.770624	X
M	68	AVN	1.72	73	24.6755	16	50.28	20.91	16.66	35.03	16.91	27.64	16.45	3.01801	0.796748	0.475592	0.549722	0.972797	X
M	72	Hip dysplasia	1.65	58	21.3039	13	55.38	18.66	15.53	33.38	14.79	27.72	12.55	3.566	0.832262	0.465249	0.500542	0.848546	X
M	66	AVN	1.67	68.6	24.5975	16	52.4	23.09	13.95	31.39	18.58	30.57	17.41	3.75627	0.604158	0.444409	0.583397	0.937029	X
M	66	AVN	1.67	68.6	24.5975	16	54.19	20.93	15.71	33.64	19.8	35.38	18.38	3.4494	0.750597	0.467004	0.652888	0.928283	X
F	63	Hip dysplasia	1.611	68.4	26.3551	14	45.25	21.23	14.53	29.33	15.98	30.57	15.57	3.11425	0.684409	0.495397	0.67558	0.974343	O	B
F	62	O.A	1.53	56.5	24.136	11	46.02	15.28	10.84	28.78	12.74	27.93	12.44	4.24539	0.709424	0.37665	0.60691	0.976452	X
M	81	AVN	1.63	63.2	23.7871	12	42.53	20.23	13.97	30.24	15.44	27.13	12.84	3.04438	0.690559	0.461971	0.637903	0.831606	X
F	75	AVN	1.46	57.8	27.1158	12	47.51	17.33	12.3	29.7	15.2	30.42	13.55	3.8626	0.709752	0.414141	0.640286	0.891447	X
F	65	AVN	1.56	60	24.6548	11	49.82	16.28	12.68	28.53	13.37	28.42	11.49	3.92902	0.77887	0.444444	0.570454	0.859387	O	B
M	73	Posttraumatic O.A	1.55	63	26.2227	12	44.21	18.44	15.23	33.31	14.31	24.28	13.18	2.90282	0.825922	0.45722	0.549197	0.921034	X
M	50	AVN	1.67	72	25.8166	13	50.07	16.06	12.33	29.14	13.3	21.74	12.74	4.06083	0.767746	0.42313	0.434192	0.957895	X
M	70	AVN	1.6	62	24.2187	16	48.87	21.79	17.2	32.18	17.36	27.12	15.24	2.84128	0.789353	0.534493	0.554942	0.87788	X
F	70	AVN	1.566	80.7	32.9071	10	44.59	14.74	11.05	33.16	12.79	29.38	10.23	4.03529	0.749661	0.333233	0.658892	0.799844	X
M	56	AVN	1.617	62.8	24.0182	14	47.48	22.05	16.4	33.92	18.59	30.1	14.67	2.89512	0.743764	0.483491	0.633951	0.789134	X
F	78	O.A	1.4	46	23.4694	12	43.17	14.85	11.49	23.54	14.36	22.02	12.71	3.75718	0.773737	0.488105	0.510076	0.885097	X
M	65	AVN	1.6	65	25.3906	10	54.26	15.87	8.3	32.04	11.64	24.68	8.63	6.53735	0.522999	0.259051	0.454847	0.741409	X
M	65	AVN	1.6	65	25.3906	10	57.3	15.12	10.29	33.09	12.47	25.45	8.25	5.56851	0.680556	0.31097	0.444154	0.661588	X
M	68	AVN	1.71	60	20.5191	13	58.97	21.98	12.56	33.86	14.57	29.22	13.69	4.69506	0.571429	0.370939	0.495506	0.939602	X
M	68	AVN	1.71	60	20.5191	14	52.09	21.84	13.47	31.94	14.33	25.38	14.01	3.86711	0.616758	0.421728	0.487234	0.977669	X
M	63	AVN	1.61	55	21.2183	11	43.22	17.45	12.03	32.95	11.66	22.53	10.14	3.59268	0.689398	0.365099	0.521286	0.86964	X
M	60	AVN	1.62	61	23.2434	12	38.28	14.75	12.52	31.42	12.47	19.66	7.56	3.05751	0.848814	0.398472	0.513584	0.606255	X
M	56	O.A	1.69	74	25.9095	9	51.96	16.95	11.3	26.55	13.49	24.16	12.39	4.59823	0.666667	0.425612	0.464973	0.918458	X
M	53	AVN	1.759	72.6	23.4642	16	54.93	24.07	19.83	32.6	19.23	29.88	16.94	2.77005	0.823847	0.608282	0.543965	0.880915	X
M	67	Hip dysplasia	1.478	64	29.2975	14	51.35	19.19	14.39	24.83	14.06	23.39	13.23	3.56845	0.74987	0.579541	0.455501	0.940967	X
M	64	Hip dysplasia	1.581	56.355	22.546	12	54.21	18.32	12.12	30.16	14.44	26.85	12.72	4.47277	0.661572	0.401857	0.495296	0.880886	X
M	67	AVN	1.666	56.3	20.2842	16	47.18	20.25	16.81	35.16	17.93	29.33	17.07	2.80666	0.830123	0.4781	0.621662	0.952036	O	TL & B
M	67	Posttraumatic O.A	1.58	63.25	25.3365	12	48.51	15.77	10.3	27.1	12.98	22.55	12.71	4.70971	0.653139	0.380074	0.464853	0.979199	X
F	72	Hip dysplasia	1.443	59.5	28.5749	11	50.62	18.45	11.58	29.6	13.84	29.08	12.15	4.37133	0.627642	0.391216	0.574476	0.87789	O	B
F	72	Hip dysplasia	1.443	59.5	28.5749	11	56.24	19.35	12.02	30.53	12.45	28.81	11.02	4.67887	0.621189	0.393711	0.512269	0.885141	X
M	71	Posttraumatic O.A	1.656	68	24.7964	11	60.56	17.46	12.4	30.43	13.59	25.94	11.66	4.88387	0.710195	0.407493	0.428336	0.857984	X
M	77	Hip dysplasia	1.634	61.3	22.9592	12	46.49	18.98	12.96	28.16	14.75	25.93	11.91	3.58719	0.682824	0.460227	0.557754	0.807458	X
M	70	AVN	1.561	51.2	21.0118	12	49.44	16.99	13.32	29.43	14.5	26.37	12.79	3.71171	0.783991	0.452599	0.533374	0.882069	X
M	67	AVN	1.569	71.25	28.9427	12	47.43	17.47	12.64	30.11	13.82	26.23	12.13	3.75237	0.723526	0.419794	0.553026	0.877713	X
M	51	Neck fracture	1.73	71	23.7228	13	57.56	19.77	12.42	31.04	15.98	30.21	14.78	4.63446	0.628225	0.400129	0.524844	0.924906	X
M	81	AVN	1.549	70.4	29.3407	12	52.32	19.44	12.2	32.88	13.88	25.89	11.63	4.28852	0.627572	0.371046	0.494839	0.837896	X
M	61	AVN	1.657	52.8	19.2304	14	56.32	20.29	14.27	30.79	16.21	28.27	14	3.94674	0.703302	0.463462	0.501953	0.863664	X
M	68	AVN	1.68	68.45	24.2524	16	55.01	24.83	17.13	31.43	18.65	30.51	15.83	3.21133	0.689891	0.545021	0.554626	0.848794	X
M	68	AVN	1.68	68.45	24.2524	16	51.01	26.05	17.86	35.13	19.03	32.82	17.07	2.8561	0.685605	0.508397	0.643403	0.897005	X
M	68	AVN	1.612	65.4	25.1679	14	46.84	20.32	13.55	30.19	17.62	30.59	14.44	3.45683	0.666831	0.448824	0.653074	0.819523	X
M	68	AVN	1.612	65.4	25.1679	14	46.76	19.13	15.09	30.19	15.28	29.74	14.13	3.09874	0.788813	0.499834	0.636014	0.924738	X
M	68	AVN	1.69	71.4	24.9991	14	46.04	19.21	14.68	29.93	12.74	24.06	16.13	3.13624	0.764185	0.490478	0.522589	1.26609	X
M	61	AVN	1.63	66	24.841	15	52.15	19.64	13.59	32.1	15.49	25.31	14.37	3.83738	0.691955	0.423364	0.485331	0.927695	X
M	65	AVN	1.61	69	26.6193	14	43.99	18.99	15.61	29.79	17.66	29.31	15.23	2.81807	0.822012	0.524001	0.666288	0.862401	O	B
M	72	Chondrolysis	1.7	64	22.1453	15	60.5	22.74	14.61	29.2	15.8	27.39	14.68	4.141	0.64248	0.500342	0.452727	0.929114	X
M	56	LCP sequale	1.617	69.2	26.4659	12	51.66	19.57	13.21	28.14	14.39	30.4	13.6	3.91067	0.675013	0.469439	0.588463	0.945101	X
M	64	AVN	1.611	62.4	24.0433	15	52.86	21.39	17.19	30.22	18.01	30.32	15.97	3.07504	0.803647	0.568829	0.573591	0.88673	X
M	65	Neck fracture	1.68	77	27.2817	14	55.23	21.85	14.28	31.08	18.09	31.71	16.4	3.86765	0.653547	0.459459	0.574144	0.906578	X
M	72	AVN	1.581	56.5	22.604	13	51.18	18.1	12.67	31.89	15.58	31.68	13.87	4.03946	0.7	0.397303	0.618992	0.890244	X
F	84	O.A	1.71	69	23.597	16	46.11	20.73	20.63	37.03	19.71	29.26	16.41	2.23509	0.995176	0.557116	0.63457	0.832572	X
M	87	Posttramtic OA	1.7	68.2	23.5986	13	49.71	15.25	14.12	30.83	13	17.53	11.03	3.52054	0.925902	0.457995	0.352645	0.848462	X
M	55	AVN	1.658	94.3	34.3038	13	52.4	21.55	15.37	32.18	16.15	27.67	14.44	3.40924	0.713225	0.477626	0.528053	0.894118	X
M	66	AVN	1.61	69	26.6193	12	48.95	18.07	14.02	30.69	14.62	28.24	12.92	3.49144	0.775872	0.456826	0.576915	0.883721	X
M	71	AVN	1.637	56.3	21.0093	14	62.2	20.69	15	31.25	15.87	28.34	14.77	4.14667	0.724988	0.48	0.455627	0.930687	X
M	76	AVN	1.47	63	29.1545	11	40.25	12.94	9.97	28.99	13.13	26.25	12.01	4.03711	0.770479	0.343912	0.652174	0.914699	O	TL & B
M	64	AVN	1.596	60.6	23.7907	12	50.23	18.38	13.57	29.18	13.52	23.66	12.39	3.70155	0.738303	0.465045	0.471033	0.91642	X
M	68	O.A	1.653	58.1	21.2633	15	56.33	19.06	15.71	32.55	21.38	30.95	16.02	3.58561	0.824239	0.482642	0.549441	0.749298	X
F	69	AVN	1.52	67	28.9993	11	49.74	17.19	10.94	30	13.17	30.32	11.97	4.54662	0.636417	0.364667	0.60957	0.908884	X
F	71	AVN	1.52	67	28.9993	11	53.8	16.44	10.46	29.9	12.25	26.84	11.34	5.1434	0.636253	0.349833	0.498885	0.925714	X
M	71	AVN	1.65	59.5	21.8549	15	52.83	19.21	13.01	31.09	16.16	30.27	15.21	4.06072	0.677251	0.418463	0.57297	0.941213	X
M	70	AVN	1.69	84	29.4107	12	51.1	15.81	12.99	33.88	14.71	27.94	12.16	3.9338	0.821632	0.383412	0.546771	0.826649	X
M	58	AVN	1.675	67	23.8806	13	43.33	18.45	12.01	30.89	15.34	27.68	13.35	3.60783	0.650949	0.388799	0.638818	0.870274	X
M	58	AVN	1.675	67	23.8806	14	45.48	20.18	13.33	32.67	16.16	26.58	13.91	3.41185	0.660555	0.40802	0.584433	0.860767	X
M	65	AVN	1.58	56.4	22.5925	12	62.01	23.17	15.46	31.76	17.52	26.76	13.25	4.011	0.667242	0.486776	0.431543	0.756279	X
M	62	AVN	1.73	59	19.7133	16	50.88	22.78	17.35	34.53	20.01	29.59	17.06	2.93256	0.761633	0.502462	0.581564	0.852574	X
M	67	AVN	1.6	67.2	26.25	14	49.89	17.22	13.45	32.64	14.64	25.32	13.22	3.70929	0.781069	0.412071	0.507517	0.903005	X
M	67	AVN	1.561	58.3	23.9256	13	52.63	19.81	14.13	27.73	14.98	30.51	13.86	3.7247	0.713276	0.509556	0.579707	0.925234	O	B
M	67	AVN	1.561	58.3	23.9256	13	48.95	18.67	12.19	27.53	15.27	27.39	14.13	4.01559	0.652919	0.44279	0.559551	0.925344	O	TL & B
M	59	AVN	1.7	71	24.5675	12	44.64	18.25	14.89	34.12	15.98	27.97	12.93	2.99799	0.81589	0.436401	0.626568	0.809136	X
M	67	AVN	1.638	62.2	23.1826	14	55.19	18.99	15.32	31.48	17.5	32.14	15.51	3.60248	0.80674	0.486658	0.582352	0.886286	X
M	63	AVN	1.619	50	19.0755	12	51.75	14.99	9.61	27.14	13.58	27.93	13.02	5.38502	0.641094	0.35409	0.53971	0.958763	O	B
M	63	AVN	1.619	50	19.0755	12	58.29	16.87	10.6	27.95	13.58	29.33	12.98	5.49906	0.628334	0.379249	0.503174	0.955817	O	B
M	74	AVN	1.65	60	22.0386	12	49.88	16.48	12.57	31.29	13	20.77	11.64	3.96818	0.762743	0.401726	0.416399	0.895385	X
M	55	AVN	1.76	68	21.9525	16	54.23	25.85	18.72	34.55	19.75	32.75	17.46	2.8969	0.724178	0.541823	0.603909	0.884051	X
F	74	O.A	1.52	71	30.7306	13	44.72	18.28	14.22	32.81	15.38	28.35	14.32	3.14487	0.777899	0.433404	0.633945	0.931079	X
M	69	Posttraumatic O.A	1.66	66.7	24.2053	16	48.1	24.36	15.01	32.59	18.7	30.12	17.18	3.20453	0.616174	0.460571	0.626195	0.918717	X
M	69	AVN	1.586	66.3	26.3577	15	50.14	16.81	14	28.89	16.69	29.63	15.6	3.58143	0.832838	0.484597	0.590945	0.934691	X
M	69	AVN	1.586	66.3	26.3577	15	46.08	15.06	13.77	28.47	15.51	26.5	14.1	3.34641	0.914343	0.483667	0.575087	0.909091	X
M	68	AVN	1.67	64	22.9481	15	59.46	24.65	14.99	30.61	18.04	34.89	16.94	3.96664	0.608114	0.489709	0.586781	0.939024	X
M	69	Hip dysplasia	1.649	79.2	29.1262	11	59.97	19.11	16	34.28	12.7	22.3	11.85	3.74812	0.837258	0.466744	0.371853	0.933071	X
M	69	AVN	1.6	81.5	31.8359	15	57.92	22.77	17.38	33.46	15.33	29.94	12.53	3.33257	0.763285	0.519426	0.51692	0.817352	X
M	69	AVN	1.5	50.3	22.3556	11	50.5	18.84	11.69	30.9	12.42	28.98	11.27	4.31993	0.620488	0.378317	0.573861	0.907407	X
M	73	Hip dysplasia	1.57	50	20.2848	12	50.53	18.91	13.84	30.21	14.4	31.32	12.7	3.65101	0.731888	0.458126	0.61983	0.881944	X
M	74	Neck fracture	1.73	68	22.7204	13	53.06	17.56	11.21	32.5	15.72	29.37	14.01	4.73327	0.638383	0.344923	0.553524	0.891221	X
M	73	Hip dysplasia	1.69	69	24.1588	13	49.47	21.2	15.83	26.56	15.1	25.96	13.65	3.12508	0.746698	0.596009	0.524762	0.903974	X
M	70	AVN	1.626	57.1	21.5971	16	43.78	20.55	14.92	32.37	16.96	27.36	15.52	2.93432	0.726034	0.460921	0.624943	0.915094	X
M	67	O.A	1.665	73.05	26.3507	14	40.95	16.15	15.28	35.14	17.25	27.98	14.99	2.67997	0.94613	0.434832	0.683272	0.868986	X
M	57	Neck fracture	1.7	68	23.5294	15	53.99	21.45	18.07	33.68	16.53	26.97	15.06	2.98783	0.842424	0.53652	0.499537	0.911071	X
M	71	AVN	1.62	82	31.2452	13	45.35	19.66	16.2	31.8	18.39	31.57	14.13	2.79938	0.824008	0.509434	0.696141	0.768352	O	B
M	59	AVN	1.635	36	13.4669	12	44.46	23.91	21.09	35.31	18.67	24	12.45	2.10811	0.882058	0.597281	0.539811	0.666845	X
F	71	AVN	1.551	65.9	27.3944	12	44.17	16.32	11.25	27.86	13.07	26.13	12.99	3.92622	0.689338	0.403805	0.591578	0.993879	X
M	64	A.S	1.58	65	26.0375	16	37.15	20.25	15.66	29.34	20.16	29.28	17.52	2.37229	0.773333	0.533742	0.788156	0.869048	X
F	74	O.A	1.49	66	29.7284	12	50.88	17.6	10.75	30.06	14.62	27.84	13.49	4.73302	0.610795	0.357618	0.54717	0.922709	O	B
F	56	AVN	1.515	65	28.3197	12	43.59	16.83	12.3	27.17	13.63	26.04	12.1	3.5439	0.730838	0.452705	0.597385	0.887748	X
M	48	AVN	1.646	55.7	20.5587	12	57.65	21.21	15.39	30.12	15.32	29.16	13.1	3.74594	0.725601	0.510956	0.505811	0.855091	X
M	69	AVN	1.705	60.7	20.8805	16	49.82	22.07	17.28	35.37	19.12	33.38	17.22	2.8831	0.782963	0.48855	0.670012	0.900628	X
F	78	Hip dysplasia	1.498	57.5	25.6238	12	47.5	15.82	12.73	27.16	14.23	24.94	13.76	3.73134	0.804678	0.468704	0.525053	0.966971	O	TL & B
M	39	AVN	1.7	70	24.2215	13	51.57	21.4	13.79	27.87	11.88	24.05	29.44	3.73967	0.644393	0.494797	0.466356	2.47811	O	B
F	63	Hip dysplasia	1.594	57	22.4336	11	54.94	18.8	11.45	27.34	12.19	25.46	11.91	4.79825	0.609043	0.4188	0.463415	0.97703	O	B
M	65	AVN	1.57	42	17.0392	13	54.19	15.85	13.15	26.33	14.07	28.61	13.51	4.12091	0.829653	0.49943	0.527957	0.960199	X
M	65	AVN	1.57	42	17.0392	13	57.85	18.4	12.02	27.8	13.86	26.58	13.02	4.81281	0.653261	0.432374	0.459464	0.939394	X
M	69	AVN	1.484	57	25.8825	11	40.53	13.89	10.24	33.19	15.55	24.37	12.18	3.95801	0.737221	0.308527	0.601283	0.78328	X
M	50	AVN	1.5	63	28	14	47.87	19.6	16.21	28.64	16.58	30.49	15.86	2.95312	0.827041	0.565992	0.636933	0.956574	X
M	69	AVN	1.59	60	23.7332	13	53.99	17	12.87	28.43	15.6	29.66	13.93	4.19503	0.757059	0.452691	0.549361	0.892949	X
F	77	AVN	1.44	52.5	25.3183	13	50.86	19.78	17.66	29.83	17.25	30.6	14.15	2.87995	0.892821	0.592021	0.601652	0.82029	X
M	66	O.A	1.723	72.5	24.4212	13	50.67	19.43	13.53	30.12	14.97	23.2	13.28	3.74501	0.696346	0.449203	0.457865	0.887108	X
M	64	AVN	1.67	63	22.5896	15	46.4	21.09	16.13	31.232	16.96	25.6	14.29	2.87663	0.764817	0.516457	0.551724	0.842571	X
M	65	Hip dysplasia	1.59	67	26.5021	10	54.89	17.87	11.1	31.68	10.19	26.27	9.25	4.94505	0.621153	0.350379	0.478594	0.907753	X
M	66	AVN	1.59	55.7	22.0324	13	50.24	17.88	13.04	31.03	14.63	26.99	13.92	3.85276	0.729306	0.420238	0.537221	0.95147	X
M	70	AVN	1.58	41.3	16.5438	12	53.08	17.52	11.33	29.63	15.98	28.01	13.17	4.68491	0.646689	0.382383	0.527694	0.824155	X
M	45	AVN	1.61	54.2	20.9097	12	51.21	18.77	13.12	28.85	15.86	30.72	13.21	3.9032	0.698988	0.454766	0.599883	0.832913	X
F	72	AVN	1.45	52.75	25.0892	12	45.29	17.4	11.65	26.2	16.01	31.82	14.9	3.88755	0.66954	0.444656	0.702583	0.930668	O	TL& B
